# Supplementary material
Source: ML conference proceedings conference paper supplement (https://proceedings.mlr.press/v84/kasai18a.html)
Supplement: Supplementary file 1 [file kasai18a-supp.pdf]

---

## Supplementary material: Riemannian stochastic quasi-Newton algorithm with variance reduction and its convergence analysis

---

### A Manifolds in numerical comparison

This section gives a brief explanation of the manifolds that appear in the numerical comparisons in Section 5.

#### A.1 SPD manifold

Let  $\mathcal{S}_{++}^d$  be the manifold of  $d \times d$  SPD matrices [35]. If we endow  $\mathcal{S}_{++}^d$  with the Riemannian metric [36] defined by

$$\langle \xi_{\mathbf{X}}, \eta_{\mathbf{X}} \rangle_{\mathbf{X}} = \text{trace}(\xi_{\mathbf{X}} \mathbf{X}^{-1} \eta_{\mathbf{X}} \mathbf{X}^{-1}), \quad \xi_{\mathbf{X}}, \eta_{\mathbf{X}} \in T_{\mathbf{X}} \mathcal{S}_{++}^d,$$

at  $\mathbf{X} \in \mathcal{S}_{++}^d$ , the SPD manifold  $\mathcal{S}_{++}^d$  becomes a Riemannian manifold. The explicit formula for the exponential mapping with respect to this metric is given by

$$\text{Exp}_{\mathbf{X}}(\xi_{\mathbf{X}}) = \mathbf{X}^{1/2} \exp(\mathbf{X}^{-1/2} \xi_{\mathbf{X}} \mathbf{X}^{-1/2}) \mathbf{X}^{1/2}$$

for any  $\xi_{\mathbf{X}} \in T_{\mathbf{X}} \mathcal{S}_{++}^d$  and  $\mathbf{X} \in \mathcal{S}_{++}^d$ , where  $\exp(\cdot)$  is the matrix exponential function. On the other hand,  $R_{\mathbf{X}}(\xi_{\mathbf{X}}) = \mathbf{X} + \xi_{\mathbf{X}} + \frac{1}{2} \xi_{\mathbf{X}} \mathbf{X}^{-1} \xi_{\mathbf{X}}$  proposed in [37] is a retraction, which is symmetric positive-definite for all  $\xi_{\mathbf{X}} \in T_{\mathbf{X}} \mathcal{S}_{++}^d$  and  $\mathbf{X} \in \mathcal{S}_{++}^d$ . The parallel translation on  $\mathcal{S}_{++}^d$  along  $\eta_{\mathbf{X}}$  is given by

$$P_{\eta_{\mathbf{X}}}(\xi_{\mathbf{X}}) = \mathbf{X}^{1/2} \mathbf{Y} \mathbf{X}^{-1/2} \xi_{\mathbf{X}} \mathbf{X}^{-1/2} \mathbf{Y} \mathbf{X}^{1/2},$$

where  $\mathbf{Y} = \exp(\mathbf{X}^{-1/2} \eta_{\mathbf{X}} \mathbf{X}^{-1/2} / 2)$ . A more efficient algorithm that constructs an isometric vector transport is proposed based on a field of orthonormal tangent bases [31] while satisfying the locking condition in Assumption 3. We use it in the experiment, and the details are in [21, 31]. The logarithm map of  $\mathbf{Y}$  at  $\mathbf{X}$  is given by

$$\text{Log}_{\mathbf{X}}(\mathbf{Y}) = \mathbf{X}^{1/2} \log(\mathbf{X}^{-1/2} \mathbf{Y} \mathbf{X}^{-1/2}) \mathbf{X}^{1/2} = \log(\mathbf{Y} \mathbf{X}^{-1}) \mathbf{X},$$

where  $\log(\cdot)$  is the matrix logarithm function.

#### A.2 Grassmann manifold

A point on the Grassmann manifold is an equivalence class represented by a  $d \times r$  orthogonal matrix  $\mathbf{U}$  with orthonormal columns, i.e.,  $\mathbf{U}^T \mathbf{U} = \mathbf{I}$ . Two  $d \times r$  orthogonal matrices express the same element on the Grassmann manifold if they are mapped to each other by the right multiplication of an  $r \times r$  orthogonal matrix  $\mathbf{O} \in \mathcal{O}(r)$ . Equivalently, an element of  $\text{Gr}(r, d)$  is identified with a set of  $d \times r$  orthogonal matrices  $[\mathbf{U}] := \{\mathbf{U}\mathbf{O} : \mathbf{O} \in \mathcal{O}(r)\}$ . That is,  $\text{Gr}(r, d) := \text{St}(r, d) / \mathcal{O}(r)$ , where  $\text{St}(r, d)$  is the *Stiefel manifold*, which is the set of matrices of size  $d \times r$  with orthonormal columns. The Grassmann manifold has the structure of a Riemannian quotient manifold [1, Section 3.4].

The exponential mapping for the Grassmann manifold from  $\mathbf{U}(0) := \mathbf{U} \in \text{Gr}(r, d)$  in the direction of  $\xi \in T_{\mathbf{U}(0)} \text{Gr}(r, d)$  is given in a closed form as [38]

$$\mathbf{U}(t) = [\mathbf{U}(0) \mathbf{V} \ \mathbf{W}] \begin{bmatrix} \cos t\Sigma \\ \sin t\Sigma \end{bmatrix} \mathbf{V}^T,$$

where  $\xi = \mathbf{W} \Sigma \mathbf{V}^T$  is the singular value decomposition (SVD) of  $\xi$  with rank  $r$ . The  $\sin(\cdot)$  and  $\cos(\cdot)$  operations are performed only on the diagonal entries. The parallel translation of  $\zeta \in T_{\mathbf{U}(0)} \text{Gr}(r, d)$  on the Grassmann manifold along  $\gamma(t)$  with  $\dot{\gamma}(0) = \mathbf{W} \Sigma \mathbf{V}^T$  is given in a closed form by

$$\zeta(t) = \left( [\mathbf{U}(0) \mathbf{V} \ \mathbf{W}] \begin{bmatrix} -\sin t\Sigma \\ \cos t\Sigma \end{bmatrix} \mathbf{W}^T + (\mathbf{I} - \mathbf{W} \mathbf{W}^T) \right) \zeta.$$

The logarithm map of  $\mathbf{U}(t)$  at  $\mathbf{U}(0)$  on the Grassmann manifold is given by

$$\text{Log}_{\mathbf{U}(0)}(\mathbf{U}(t)) = \mathbf{W} \arctan(\Sigma) \mathbf{V}^T,$$

where  $\mathbf{W}\Sigma\mathbf{V}^T$  is the SVD of  $(\mathbf{U}(t) - \mathbf{U}(0)\mathbf{U}(0)^T\mathbf{U}(t))(\mathbf{U}(0)^T\mathbf{U}(t))^{-1}$  with rank  $r$ . Furthermore, a popular retraction is

$$R_{\mathbf{U}(0)}(\xi) = \text{qf}(\mathbf{U}(0) + t\xi) \quad (= \mathbf{U}(t)),$$

which extracts the orthonormal factor based on the QR decomposition, and a popular vector transport uses an orthogonal projection of  $\xi$  to the horizontal space at  $\mathbf{U}(t)$ , i.e.,  $(\mathbf{I} - \mathbf{U}(t)\mathbf{U}(t)^T)\xi$  [1].

## B Two-loop Hessian inverse update algorithm

This section summarizes the Riemannian two-loop Hessian inverse updating algorithm in Algorithm A.1. This is a straightforward extension of that in the Euclidean space explained in [27, Section 7.2].

---

### Algorithm A.1 Hessian inverse update

---

**Require:** Memory depth  $\tau$ , correction pairs  $\{s_u^k, y_u^k\}_{u=k-\tau}^{k-1}$ , gradient  $p$ .

- 1:  $p_0 = p$ .
  - 2:  $\mathcal{H}_k^0 = \chi_k \text{id} = \frac{\langle s_{k-1}^k, y_{k-1}^k \rangle}{\langle y_{k-1}^k, y_{k-1}^k \rangle} \text{id}$ .
  - 3: **for**  $u = 0, 1, 2, \dots, \tau - 1$  **do**
  - 4:      $\rho_{k-u} = 1 / \langle s_{k-u-1}^k, y_{k-u-1}^k \rangle$ .
  - 5:      $\alpha_u = \rho_{k-u-1} \langle s_{k-u-1}^k, p_u \rangle$ .
  - 6:      $p_{u+1} = p_u - \alpha_u y_{k-u-1}^k$ .
  - 7: **end for**
  - 8:  $q_0 = \mathcal{H}_k^0 p_\tau$ .
  - 9: **for**  $u = 0, 1, 2, \dots, \tau - 1$  **do**
  - 10:      $\beta_u = \rho_{k-\tau+u} \langle y_{k-\tau+u}^k, q_u \rangle$ .
  - 11:      $q_{u+1} = q_u + (\alpha_{\tau-u-1} - \beta_u) s_{k-\tau+u}^k$ .
  - 12: **end for**
  - 13:  $q = q_\tau$ .
- 

## C Proofs of convergence analysis on non-convex functions

This section presents proofs of the global convergence analysis on non-convex functions. In this supplement, only sketches of some proofs are provided, or some proofs are omitted. Hereinafter, we use  $\mathbb{E}[\cdot]$  to express expectation with respect to the joint distribution of all random variables. For example,  $w_t$  ( $= w_t^k$ ) is determined by the realizations of the independent random variables  $\{i_0^0, i_1^0, \dots, i_{m_0-1}^0, \dots, i_0^k, i_1^k, \dots, i_{t-1}^k\}$ , and the total expectation of  $f(w_t)$  for any  $t \in \mathbb{N}$  can be taken as  $\mathbb{E}[f(w_t)] = \mathbb{E}_{i_0^0} \mathbb{E}_{i_1^0} \dots \mathbb{E}_{i_{t-1}^k} [f(w_t)]$ . We also use  $\mathbb{E}_{i_t}[\cdot]$  to denote an expected value taken with respect to the distribution of the random variable  $i_t$ . Moreover, we omit the subscript  $\tilde{w}^k$  for a Riemannian metric  $\langle \cdot, \cdot \rangle_{\tilde{w}^k}$  when the tangent space to be considered is clear.

### C.1 Eigenvalue bounds of $\mathcal{H}_t^k$ on non-convex functions

We present an essential proposition that bounds the eigenvalues of  $\mathcal{H}_t^k$  at  $w_t$ , i.e.,  $\mathcal{H}_t^k := \mathcal{T}_{\tilde{w}^k}^{w_t} \circ \tilde{\mathcal{H}}^k \circ (\mathcal{T}_{\tilde{w}^k}^{w_t})^{-1}$ . To this end, we use the *Hessian approximation operator*  $\tilde{\mathcal{B}}^k = (\tilde{\mathcal{H}}^k)^{-1}$  instead of  $\tilde{\mathcal{H}}^k$ . As mentioned in the algorithm description, we consider curvature information for  $\tilde{\mathcal{H}}^k$  at  $\tilde{w}^k$ , i.e., every outer epoch, and reuse this  $\tilde{\mathcal{H}}^k$  in the calculation of the second-order modified stochastic gradient  $\mathcal{H}_t^k \xi_t$  at  $w_t$ . Thus, the proof consists of two steps as follows:

1. We first address the bounds of  $\tilde{\mathcal{H}}^k$  at  $\tilde{w}^k$ . The main task of the proof is to bound the Hessian operator  $\tilde{\mathcal{B}}^k = (\tilde{\mathcal{H}}^k)^{-1}$ .

2. We bound  $\mathcal{H}_t^k$  at  $w_t$  based on the bounds of  $\tilde{\mathcal{H}}^k$  at  $\tilde{w}^k$ .

It should be noted that in this subsection, the curvature pair  $\{s_j^k, y_j^k\}_{j=k-L}^{k-1} \in T_{\tilde{w}^k} \mathcal{M}$  is simply denoted by  $\{s_j, y_j\}_{j=k-L}^{k-1}$ .

We first state a lemma for the bound of  $\frac{\langle y_k, y_k \rangle}{\langle s_k, y_k \rangle}$ .

**Lemma C.1.** *Suppose Assumption 1 holds. There exists a constant  $\Upsilon_{nc} > 0$  such that for all  $k$*

$$\frac{\langle y_k, y_k \rangle}{\langle s_k, y_k \rangle} \leq \Upsilon_{nc}.$$

*Proof.* We directly obtain  $\frac{\|s_k\|^2}{\langle y_k, s_k \rangle} \leq \frac{1}{\epsilon}$  from (4) in the cautious update. Then, we obtain the upper bound of  $\frac{\langle y_k, y_k \rangle}{\langle s_k, y_k \rangle}$  as below taking also into account the fact  $\|y_k\| \leq c_1 \|s_k\|$  (Lemma 3.9 in [21]), where  $c_1 > 0$  is a constant,

$$\frac{\langle y_k, y_k \rangle}{\langle s_k, y_k \rangle} = \frac{\|s_k\|^2}{\langle s_k, y_k \rangle} \cdot \frac{\|y_k\|^2}{\|s_k\|^2} \leq \frac{c_1^2}{\epsilon} \quad (= \Upsilon_{nc}).$$

Denoting  $c_1^2/\epsilon$  as  $\Upsilon_{nc}$ , this completes the proof.  $\square$

Next, we bound  $\text{trace}(\hat{\mathcal{B}})$  to bound the eigenvalues of  $\tilde{\mathcal{H}}^k$ , where a *hat* denotes the coordinate expression of the operator. The basic structure of the proof follows those of stochastic L-BFGS methods in the Euclidean space, e.g., [25, 16, 15]. Nevertheless, some special treatment is required in light of the Riemannian setting. It should be noted that  $\text{trace}(\hat{\mathcal{B}})$  does not depend on the chosen basis.

**Lemma C.2** (Bounds of trace of  $\tilde{\mathcal{B}}^k$ ). *Consider the recursion of  $\tilde{\mathcal{B}}_u^k$  as*

$$\tilde{\mathcal{B}}_{u+1}^k = \tilde{\mathcal{B}}_u^k - \frac{\tilde{\mathcal{B}}_u^k s_{k-\tau+u} (\tilde{\mathcal{B}}_u^k s_{k-\tau+u})^b}{(\tilde{\mathcal{B}}_u^k s_{k-\tau+u})^b s_{k-\tau+u}} + \frac{y_{k-\tau+u} y_{k-\tau+u}^b}{y_{k-\tau+u}^b s_{k-\tau+u}}, \quad (\text{A.1})$$

where  $\tilde{\mathcal{B}}_u^k = \mathcal{T}_{\tilde{w}^{k-1}} \circ \tilde{\mathcal{B}}_u^k \circ (\mathcal{T}_{\tilde{w}^{k-1}})^{-1}$  for  $u = 0, \dots, \tau - 1$ . The Hessian approximation at the  $k$ -th outer epoch is  $\tilde{\mathcal{B}}^k = \tilde{\mathcal{B}}_\tau^k$  when  $u = \tau - 1$ . Then, consider the Hessian approximation  $\tilde{\mathcal{B}}^k = \tilde{\mathcal{B}}_\tau^k$  in (A.1) with  $\tilde{\mathcal{B}}_0^k = \frac{\langle y_k, y_k \rangle}{\langle s_k, y_k \rangle} \text{id}$ . If Assumption 1 holds,  $\text{trace}(\tilde{\mathcal{B}}^k)$  in a coordinate expression of  $\tilde{\mathcal{B}}^k$  is uniformly upper bounded for all  $k \geq 1$  as

$$\text{trace}(\tilde{\mathcal{B}}^k) \leq (M + \tau) \Upsilon_{nc},$$

where  $M$  is the dimension of  $\mathcal{M}$ . Here, a *hat* expression represents the coordinate expression of an operator.

*Proof.* The bound of  $\text{trace}(\hat{\mathcal{B}}^k)$  is first obtained from Lemma C.1. Then, calculating recursively the obtained relation, we can bound  $\text{trace}(\hat{\mathcal{B}}^k)$  by the initial value of  $\text{trace}(\hat{\mathcal{B}}^k)$ . Finally, bounding the initial value of  $\text{trace}(\hat{\mathcal{B}}^k)$  by  $M \Upsilon_{nc}$ , we obtain the claim. Since the proof can be completed in parallel to the Euclidean case [17] and the Riemannian case [29], we omit the complete proof.  $\square$

We further provide the bounds of  $\tilde{\mathcal{H}}^k$ .

**Lemma C.3** (Bounds of  $\tilde{\mathcal{H}}^k$  on non-convex functions). *If Assumption 1 holds, the eigenvalues of  $\tilde{\mathcal{H}}^k$  is bounded by some positive constants  $\gamma_{nc}$  and  $\Gamma_{nc}$  for all  $k \geq 1$  as*

$$\gamma_{nc} \text{id} \preceq \tilde{\mathcal{H}}^k \preceq \Gamma_{nc} \text{id}.$$

*Proof.* The proof first provides the bound of the sum of the eigenvalues of  $\hat{\mathcal{B}}^k$  from Lemma C.2. Then, the bound of  $\tilde{\mathcal{H}}^k$  is given. The proof for the lower bound is obtained in parallel to the Euclidean case [25]. Moreover, the upper bound is given by extending the proof of [15]. We omit the complete proof.  $\square$

Finally, we present the proposition for the bounds of  $\mathcal{H}_t^k$  on non-convex functions.

**Proposition C.4** (Bounds of  $\mathcal{H}_t^k$  on non-convex functions). *Consider the operator  $\mathcal{H}_t^k := \mathcal{T}_{\bar{w}^k}^{w_t} \circ \tilde{\mathcal{H}}^k \circ (\mathcal{T}_{\bar{w}^k}^{w_t})^{-1}$ . If Assumption 1 holds, the range of eigenvalues of  $\mathcal{H}_t^k$  is bounded below by  $\gamma_{nc}$  and above by  $\Gamma_{nc}$  for all  $k \geq 1, t \geq 1$ , i.e.,*

$$\gamma_{nc}\text{id} \preceq \mathcal{H}_t^k \preceq \Gamma_{nc}\text{id}, \quad (\text{A.2})$$

where  $\gamma_{nc}$  and  $\Gamma_{nc}$  are some positive constants.

*Proof.* Noting that  $\mathcal{H}_t^k := \mathcal{T}_{\bar{w}^k}^{w_t} \circ \tilde{\mathcal{H}}^k \circ (\mathcal{T}_{\bar{w}^k}^{w_t})^{-1}$ , where  $\tilde{\eta}_t = R_{\bar{w}^k}^{-1}(w_t)$ , and that  $\mathcal{T}_{\bar{w}^k}^{w_t}$  is a linear transformation operator, we can conclude that the eigenvalues of  $\mathcal{H}_t^k$  and  $\tilde{\mathcal{H}}^k$  are identical. In fact, let hat expressions be representation matrices with some bases of  $T_{w_t}\mathcal{M}$  and  $T_{\bar{w}^k}\mathcal{M}$ . We then have the relation  $\det(\mu\mathbf{I} - \hat{\mathcal{H}}_t^k) = \det(\mu\mathbf{I} - \hat{\tilde{\mathcal{H}}}^k)$ . Consequently, Lemma C.3 directly yields the claim. This completes the proof.  $\square$

## C.2 Proof of global convergence analysis (Theorem 4.1)

*Proof.* The proof is provided by extending that of [22] with careful treatment of  $\mathcal{H}_t^k$ . We also refer to that of [39] in the Euclidean space. We omit the complete proof.  $\square$

## C.3 Proof of global convergence rate analysis (Theorem 4.2)

The global convergence rate analysis on non-convex functions in the Euclidean SVRG has been proposed in [12]. Its further extensions to the stochastic L-BFGS setting and the Riemannian setting have been proposed in [15] and [23], respectively. The proof in this subsection mainly follows that in [12] by integrating its two extensions in [15, 23]. Moreover, retraction and vector transport are carefully treated in the proof. Finally, it should be noted that, since this section discusses the  $k$ -th epoch, we omit the superscript ‘ $k$ ’. Moreover, we also omit the subscript  $w_t$  for a Riemannian metric  $\langle \cdot, \cdot \rangle_{w_t}$  when its point is apparent.

### C.3.1 Essential propositions

This subsection first presents an essential lemma concerning the bound of  $\mathbb{E}_{i_t}[\|\xi_t\|^2]$ , where the vector transport is carefully handled. Proposition C.6 is then presented by extending [12, 15, 23]. It should be noted that we carefully treat the difference between the exponential mapping and retraction for Proposition C.6.

We first present an essential lemma.

**Lemma C.5.** *Suppose Assumption 1, which guarantees Lemmas 3.9, 3.10, and 3.11 for  $\bar{w} = w^*$ . Let  $L_l > 0$  be a constant such that*

$$\|P(\gamma)_z^w(\text{grad}f_i(z)) - \text{grad}f_i(w)\|_w \leq L_l \text{dist}(z, w), \quad w, z \in \Theta, \quad i = 1, 2, \dots, n.$$

*The existence of such an  $L_l$  is guaranteed by Lemma 3.11. Then, the upper bound of the variance of  $\mathbb{E}_{i_t}[\|\xi_t\|^2]$  is given by*

$$\mathbb{E}_{i_t}[\|\xi_t\|^2] \leq 4(L_l^2 + \tau_2^2 C^2 \theta^2)(\text{dist}(w_t, \bar{w}))^2 + 2\|\text{grad}f(w_t)\|^2.$$

*Proof.* The proof is similar to that of Lemma 5.8 in [22]. We omit the detail of the proof.  $\square$

**Proposition C.6.** *Let  $\mathcal{M}$  be a Riemannian manifold and  $w^* \in \mathcal{M}$  be a non-degenerate local minimizer of  $f$  (i.e.,  $\text{grad}f(w^*) = 0$ , and the Hessian  $\text{Hess}f(w^*)$  of  $f$  at  $w^*$  is positive definite). Suppose Assumption 1 holds. Let the constants  $\theta$  be in (5),  $\tau_1$  and  $\tau_2$  be in (6),  $L_l$  be in (7),  $\gamma_{nc}$  and  $\Gamma_{nc}$  be in (8), and  $L$  be in Lemma 3.4. For  $c_t, c_{t+1}, \nu_t > 0$ , we set*

$$c_t = c_{t+1} \left( 1 + \alpha_t \nu_t + 4\zeta \alpha_t^2 (L_l^2 + \tau_2^2 C^2 \theta^2) \frac{\Gamma_{nc}^2}{\tau_1^2} \right) + 2\alpha_t^2 L (L_l^2 + \tau_2^2 C^2 \theta^2) \Gamma_{nc}^2. \quad (\text{A.3})$$

We also define

$$\Delta_t := \alpha_t \left( \gamma_{nc} - \frac{c_{t+1} \Gamma_{nc}^2}{\nu_t \tau_1^2} - \alpha_t L \Gamma_{nc}^2 - 2c_{t+1} \zeta \alpha_t \frac{\Gamma_{nc}^2}{\tau_1^2} \right). \quad (\text{A.4})$$

Let  $\alpha_t, \nu_t$ , and  $c_{t+1}$  be defined such that it holds  $\Delta_t > 0$ . It then follows that for any sequence  $\{\tilde{w}_t\}$  generated by Algorithm 1 with Option I-B and with a fixed step size  $\alpha_t := \alpha$  and  $m_k := m$  converging to  $w^*$ , the expected squared norm of the Riemannian gradient,  $\text{grad}f(w_t)$ , satisfies the bound as

$$\mathbb{E}[\|\text{grad}f(w_t)\|^2] \leq \frac{V_t - V_{t+1}}{\Delta_t}, \quad (\text{A.5})$$

where  $V_t := \mathbb{E}[f(w_t) + c_t(\text{dist}(\tilde{w}, w_t))^2]$  for  $0 \leq k \leq K - 1$ .

*Proof.* The sketch of the proof is as follows: We first obtain the relation between  $\mathbb{E}[f(w_{t+1})]$  and  $f(w_t)$  from Lemma 3.4. We then bound the expected squared distance between  $\tilde{w}$  and  $w_{t+1}$ , i.e.,  $\mathbb{E}[(\text{dist}(\tilde{w}, w_{t+1}))^2]$ , from Lemma 6 in [40] by considering (6) in Lemma 3.10 and Proposition C.4. We also use  $\mathbb{E}_{i_t}[\mathcal{H}_t \xi_t] = \mathcal{H}_t \text{grad}f(w_t)$ . Next, we introduce a function defined as  $V_t := \mathbb{E}[f(w_t) + c_t(\text{dist}(\tilde{w}, w_t))^2]$ , which measures how far the given parameter  $w_t$  is from  $\tilde{w}$  and the objective function value. Finally, calculating  $V_{t+1}$  from Lemma C.5, we obtain the claim.  $\square$

The following proposition is very similar to Theorem 2 in [12].

**Proposition C.7** (Theorem 2 in [12]). *Let  $\mathcal{M}$  be a Riemannian manifold and  $w^* \in \mathcal{M}$  be a non-degenerate local minimizer of  $f$ . Consider Algorithm 1 with Option I-B and II-A, and suppose Assumption 1 holds. Let the constants  $\theta$  be in (5),  $\tau_1$  and  $\tau_2$  be in (6), and  $L_l$  be in (7).  $\gamma_{nc}$  and  $\Gamma_{nc}$  are the constants in (8). Let  $c_m = 0$ ,  $\alpha_t = \alpha > 0$ ,  $\nu_t = \nu > 0$ , and  $c_t$  is defined as (A.3) such that  $\Delta_t$  defined in (A.4) satisfies  $\Delta_t > 0$  for  $0 \leq t \leq m - 1$ . Define  $\delta_t := \min_t \Delta_t$ . Let  $T$  be  $mK$ . It then follows that for the output  $w_{\text{sol}}$  of Algorithm 1,*

$$\mathbb{E}[\|\text{grad}f(w_{\text{sol}})\|_{w_{\text{sol}}}^2] \leq \frac{f(w^0) - f(w^*)}{T\delta_t}. \quad (\text{A.6})$$

*Proof.* Because the proof is identical to those in [12, 15, 23], we omit the detail. The complete proof is there. A sketch of the proof is as follows: We first telescope the sum of (A.5) from  $t = 0$  to  $t = m - 1$  by introducing  $\delta_t$ , and estimate its upper bound from the difference between  $V_0^s$  and  $V_0^m$ . After showing that this difference is equivalent to the expected difference between  $f(\tilde{w}^k)$  and  $f(\tilde{w}^{k+1})$ , summing up from  $k = 0$  to  $k = K - 1$ , we obtain the desired claim.  $\square$

### C.3.2 Main proof of Theorem 4.2

*Proof.* The proof is based on the extensions of results in [12, 15, 23]. We omit the complete proof. A sketch of the proof is as follows: From (A.4) in Proposition C.6, we need to consider the upper bound of  $c_t$  defined in (A.3). To this end, the upper bound of  $c_0$  is first derived. For this particular purpose, denoting, for simplicity,  $\varphi = \alpha\nu + 4\zeta\alpha^2(L_l^2 + \tau_2^2 C^2 \theta^2) \frac{\Gamma_{nc}^2}{\tau_1^2}$  and  $\omega = \tau_2 C \theta$ , we first give the bound of  $\varphi$  as  $\varphi \in \left(\frac{\mu_0 \zeta^{1-2a_2}}{n^{3a_1/2}}, 5\frac{\mu_0 \zeta^{1-2a_2}}{n^{3a_1/2}}\right)$ . Then, considering the recurrence relation  $c_t = c_{t+1}(1 + \varphi) + 2\alpha^2 L(L_l^2 + \omega^2) \Gamma_{nc}^2$ , we obtain the bound of  $c_0$ . Next, we attempt to estimate the lower bound of  $\delta_t$ , i.e.,  $\min_t \Delta_t$ , where the bound of  $c_0$  is used. Finally, substituting the lower bound of  $\delta_t$  into (A.6) in Proposition C.7 completes the proof.  $\square$

## D Proof of local convergence analysis on retraction strongly convex functions

This section presents a local convergence rate analysis in a neighborhood of a local minimum for retraction strongly convex functions. This *local* setting is very common and standard in manifold optimization.

### D.1 Eigenvalue bounds of $\mathcal{H}_t^k$ on retraction strongly convex functions

We first bound  $\text{trace}(\hat{\mathcal{B}})$  and  $\det(\hat{\mathcal{B}})$  to bound the eigenvalues of  $\hat{\mathcal{H}}^k$ , where a *hat* denotes the coordinate expression of the operator. The bound of  $\text{trace}(\hat{\mathcal{B}})$  is identical to that of the non-convex case in Lemma C.2. Therefore, we concentrate on the bound of  $\det(\hat{\mathcal{B}})$ . As in Lemma C.2, the proof follows that of stochastic L-BFGS methods in

the Euclidean space, e.g., [25, 16, 17]. Similarly to Section C.1, it should be noted that  $\text{trace}(\hat{\mathcal{B}})$  and  $\det(\hat{\mathcal{B}})$  do not depend on the chosen basis.

**Lemma D.1** (Bounds of trace and determinant of  $\tilde{\mathcal{B}}^k$ ). *Consider the recursion of  $\tilde{\mathcal{B}}_u^k$  defined in (A.1). If Assumptions 1 and 3 hold,  $\text{trace}(\hat{\mathcal{B}}^k)$  in a coordinate expression of  $\tilde{\mathcal{B}}^k$  is uniformly upper bounded for all  $k \geq 1$ ,*

$$\text{trace}(\hat{\mathcal{B}}^k) \leq (M + \tau)\Upsilon_c,$$

where  $M$  is the dimension of  $\mathcal{M}$ . Similarly, if Assumptions 1 and 3 hold,  $\det(\hat{\mathcal{B}}^k)$  in a coordinate expression of  $\tilde{\mathcal{B}}^k$  is uniformly lower bounded for all  $k$  as

$$\det(\hat{\mathcal{B}}^k) \geq v^M \left[ \frac{\mu}{(M + \tau)\Upsilon_c} \right]^\tau.$$

Here, a hat expression represents the coordinate expression of an operator.

*Proof.* The proof follows that of the Euclidean case [25, 16, 17]. We omit the proof here.  $\square$

We next prove a lemma for the bound of  $\tilde{\mathcal{H}}^k$ .

**Lemma D.2** (Bound of  $\tilde{\mathcal{H}}^k$  on retraction strongly convex functions). *If Assumptions 1 and 3 hold, the eigenvalues of  $\tilde{\mathcal{H}}^k$  are bounded by  $\gamma_c$  and  $\Gamma_c$  with  $0 < \gamma_c < \Gamma_c < \infty$  uniformly for all  $k \geq 1$  as*

$$\gamma_c \text{id} \preceq \tilde{\mathcal{H}}^k \preceq \Gamma_c \text{id}.$$

*Proof.* The proof is given by exploiting Lemma D.1. The complete proof follows that of the Euclidean case [25, 16, 17] and we omit the detail of it.  $\square$

Finally, we give the bounds of  $\mathcal{H}_t^k$  on retraction strongly convex functions.

**Proposition D.3** (Bounds of  $\mathcal{H}_t^k$  for retraction strongly convex functions). *Consider the operator  $\check{\mathcal{H}}^k := \mathcal{T}_{\tilde{w}^k}^{w_t} \circ \tilde{\mathcal{H}}^k \circ (\mathcal{T}_{\tilde{w}^k}^{w_t})^{-1}$ . If Assumptions 1 and 3 hold, the range of eigenvalues of  $\mathcal{H}_t^k$  is bounded by some positive constants  $\gamma_c$  and  $\Gamma_c$  with  $\gamma_c < \Gamma_c$  uniformly for all  $k \geq 1, t \geq 1$ , i.e.,*

$$\gamma_c \text{id} \preceq \mathcal{H}_t^k \preceq \Gamma_c \text{id}.$$

*Proof.* Like Proposition C.4, we can give the proof by exploiting Lemma D.2. Since the proof is identical to that of Proposition C.4, the complete proof is omitted.  $\square$

## D.2 Proof of local convergence rate analysis (Theorem 4.3)

*Proof.* The sketch of the proof is as follows: From Lemma 3.4, we first obtain the relation between  $f(w_{t+1})$  and  $f(w_t)$ . Taking expectation of the relation with regard to  $i_t$ , we obtain the bound of  $\mathbb{E}_{i_t}[f(w_{t+1})] - f(w_t)$  using the fact that  $\mathbb{E}_{i_t}[\mathcal{H}_t^k \xi_t] = \mathcal{H}_t^k \text{grad} f(w_t)$  and Proposition D.3. Next, by exploiting the property of the retraction strongly convex, we obtain the new bound of  $\mathbb{E}_{i_t}[f(w_{t+1})] - f(w_t)$  with the constant  $\mu$  of the retraction strongly convex. Plugging the bound of  $\mathbb{E}_{i_t}[\|\xi_t^k\|^2]$  (Lemma 5.12 in [22]) into this bound, the bound of  $\mathbb{E}_{i_t}[f(w_{t+1})] - f(w_t)$  is further obtained. Here, using Lemma 3.5 with  $\text{grad} f(w^*) = 0$  and Lemma 3.10, we obtain the lower bounds of  $f(w_t) - f(w^*)$  and  $f(\tilde{w}^k) - f(w^*)$ . Therefore, plugging these into the bound of  $\mathbb{E}_{i_t}[f(w_{t+1})] - f(w_t)$ , we obtain the new bound. Finally, taking expectations over all random variables and further summing over  $t = 0, \dots, m-1$  of the inner loop on the  $k$ -th epoch, we obtain the upper bound of  $\mathbb{E}[f(\tilde{w}^{k+1}) - f(w^*)]$ . Thus, we obtain the claim.  $\square$

## E Additional numerical experiments

In this section, we show additional numerical experiments which do not appear in the main text.

### E.1 Matrix completion problem on synthetic datasets

#### E.1.1 Additional results

This section shows the results of six problem instances. We show only the loss on a test set  $\Phi$ , which is different from the training set  $\Omega$ . The loss on the test set demonstrates the convergence speed to a satisfactory prediction accuracy of missing entries.

**Case MC-S1:** We first show the results of the comparison when the number of samples  $n = 5000$ , the dimension  $d = 200$ , the memory size  $L = 10$ , the oversampling ratio (OS) is 8, and the condition number (CN) is 50. We also add Gaussian noise  $\sigma = 10^{-10}$ . Figures A.1 show the results of four runs excluding the result shown in the main text, which corresponds to "run 1." They show superior performance to other algorithms.

**Case MC-S2: influence on low sampling.** We look into problem instances from scarcely sampled data, e.g. OS is 4. Other conditions are the same as in **Case MC-S1**. From Figures A.2, we see that the proposed algorithm gives much better and stabler performance against other algorithms.

**Case MC-S3: influence on ill conditioning.** We consider the problem instances with higher condition number (CN) 100. The other conditions are the same as in **Case MC-S1**. Figures A.3 show the superior performances of the proposed algorithm against other algorithms.

**Case MC-S4: influence on higher noise.** We consider noisy problem instances, where  $\sigma = 10^{-6}$ . The other conditions are the same as in **Case MC-S1**. Figures A.4 show that the convergent MSE values are much higher than the other cases. Then, we can see the superior performance of the proposed R-SQN-VR against other algorithms.

**Case MC-S5: influence on higher rank.** We consider problem instances with higher rank, where  $r = 10$ . The other conditions are the same as in **Case MC-S1**. From Figures A.5, the proposed R-SQN-VR still shows superior performance to other algorithms. Grouse indicates a faster decrease in the MSE at the begging of the iterations. However, the convergent MSE values are much higher than those of the other methods.

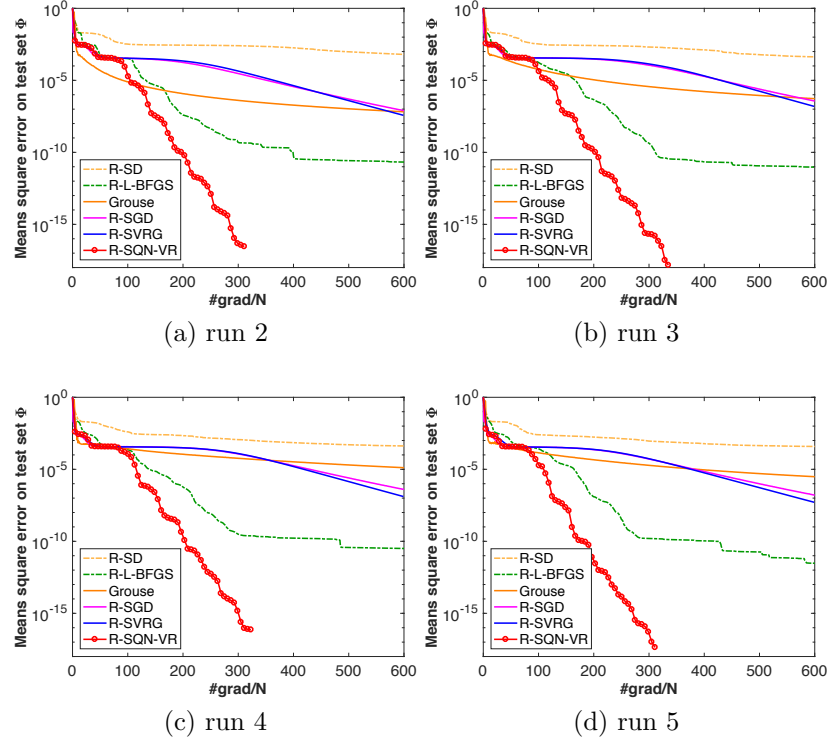

Figure A.1: Performance evaluations on low-rank MC problem (Case MC-S1: baseline.).

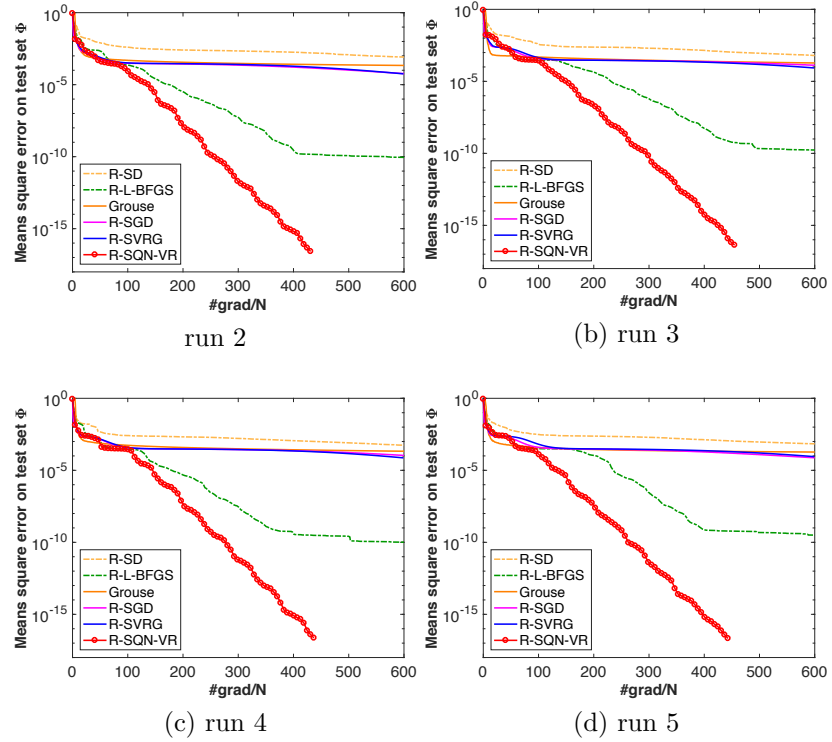

Figure A.2: Performance evaluations on low-rank MC problem (Case MC-S2: low sampling.).



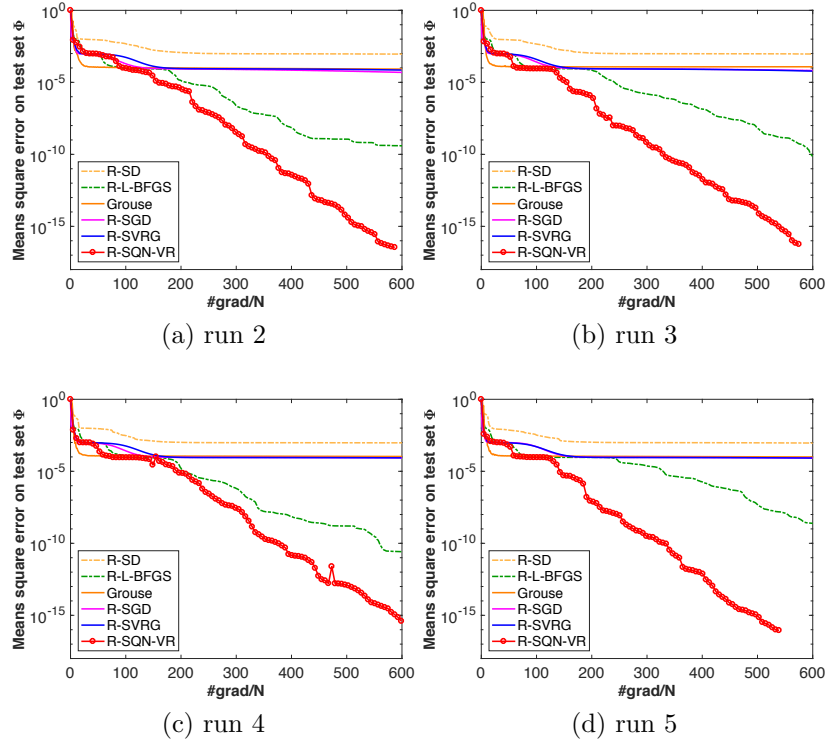

Figure A.3: Performance evaluations on low-rank MC problem (Case MC-S3: ill-conditioning.).

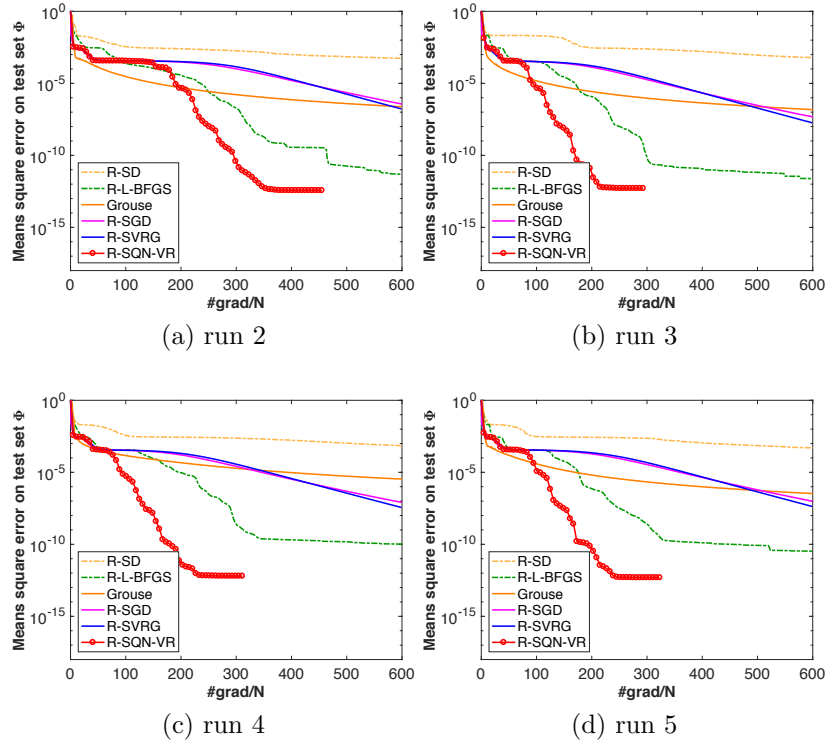

Figure A.4: Performance evaluations on low-rank MC problem (Case MC-S4: noisy data.).

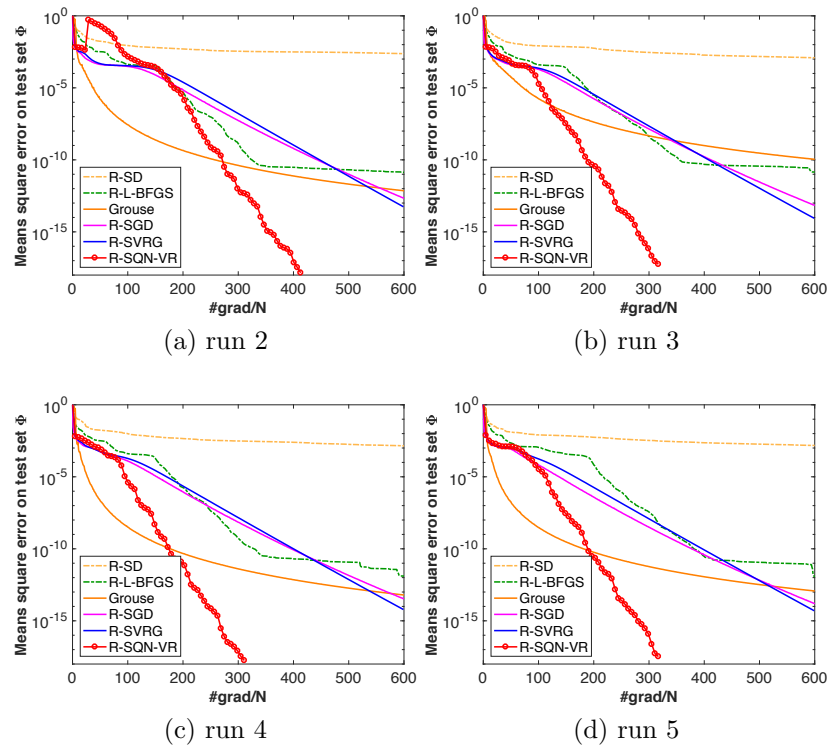

Figure A.5: Performance evaluations on low-rank MC problem (Case MC-S5: higher rank.).

### E.1.2 Processing time experiments

The results in terms of the processing time are presented.

**Case MC-S7: Comparison in terms of processing time.** Because one major concern of second-order algorithms is, in general, higher computational processing load than first-order algorithms, we additionally show the results in terms of processing times. This evaluation addresses only R-SGD, R-SVRG, and R-SQN-VR because their code structures are similar, whereas the batch-based algorithms, i.e., R-SD and R-L-BFGS, have completely different implementations. Figures A.6 (a)-(e) show the results of the relationship between test MSE and processing time [sec]. From the figures, as expected, R-SGD was much faster in terms of iterations than other algorithms. However, it should be noted that R-SGD suffered from the problem whereby it heavily reduced convergence speed around the solution as reported in the literature. Comparing R-SQN-VR with R-SVRG, R-SQN-VR still yielded better performance, although R-SQN-VR required an additional vector transport of a gradient in each inner iteration and  $L$  vector transports of the curvature pairs at every outer epoch than R-SVRG. Overall, R-SQN-VR outperformed R-SGD and R-SVRG in terms of processing time. Consequently, we also confirmed the effectiveness of the proposed R-SQN-VR from the perspective of processing time.

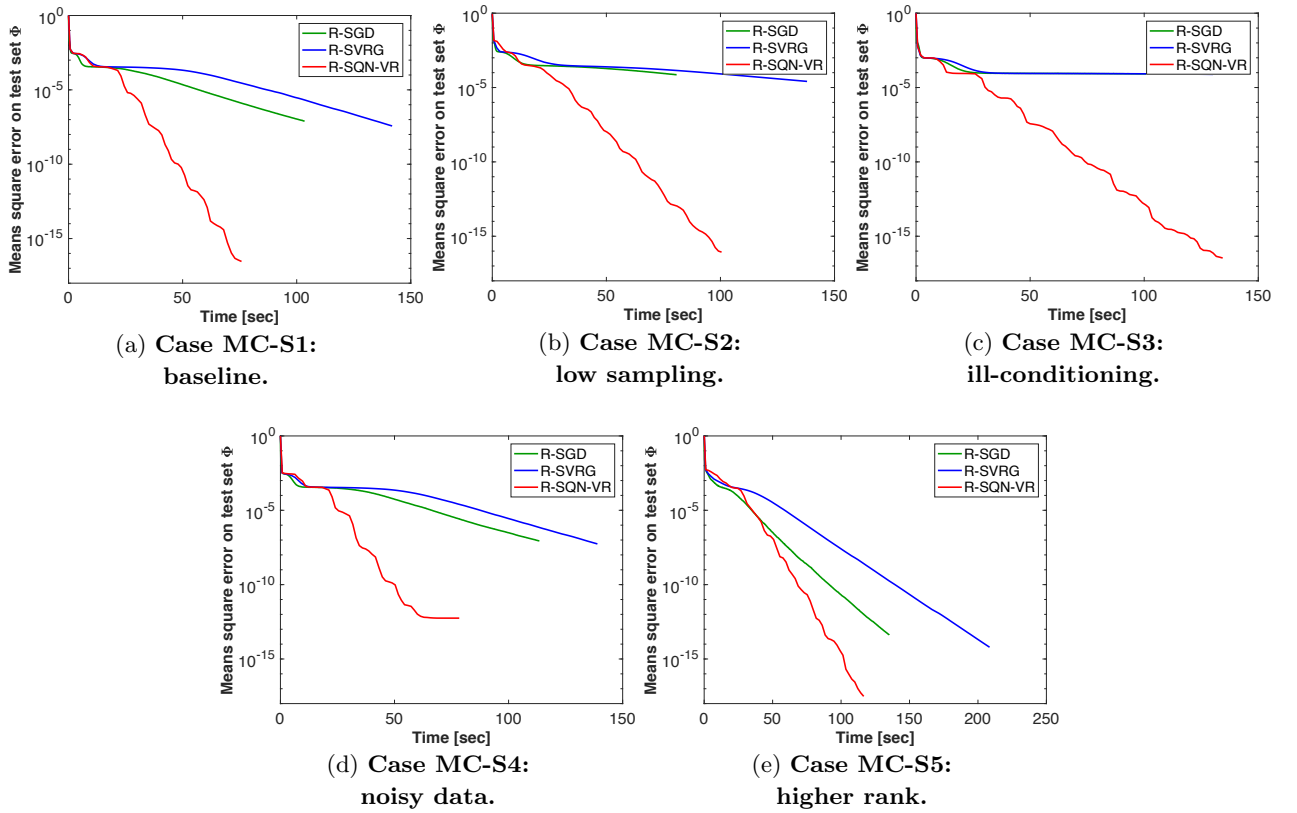

Figure A.6: Performance evaluations on low-rank MC problem (Case MC-S7).

Finally, Figure A.7 shows the results when the memory size of  $L$  was changed in R-SQN-VR. Comparing the results with those in Figure 1 (h), cases of smaller sizes improved very slightly, but we did not observe a significant advantage in terms of processing load. From these results in terms of the convergence speed and processing load, we cannot determine the best size of  $L$ . This is a subject for future research.

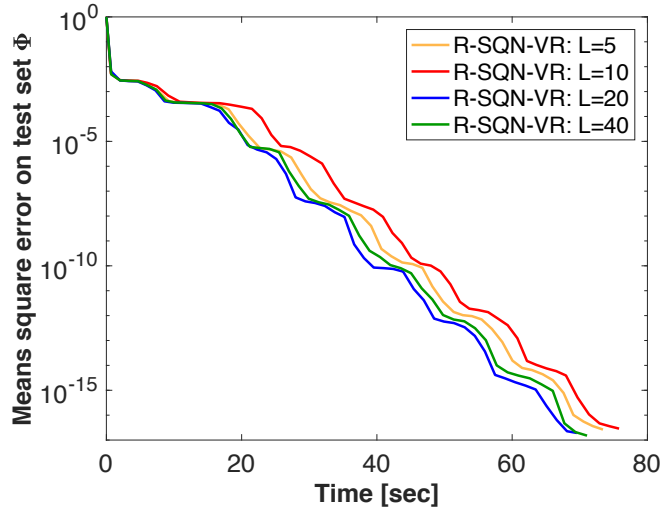

Figure A.7: Performance evaluations on low-rank MC problem (processing time) (Case MC-S6: different memory sizes).

## E.2 Matrix completion problem on MovieLens 1M dataset

Figures A.8 and A.9 show the results of the cases where  $r = 10$  (MC-R1: lower rank) and  $r = 20$  (MC-R2: higher rank), respectively. They show the convergence plots of the training error on  $\Omega$  and the test error on  $\Phi$  for all five runs when rank  $r = 10$  and  $r = 20$ , respectively. The proposed R-SQN-VR yielded good performance in all runs.

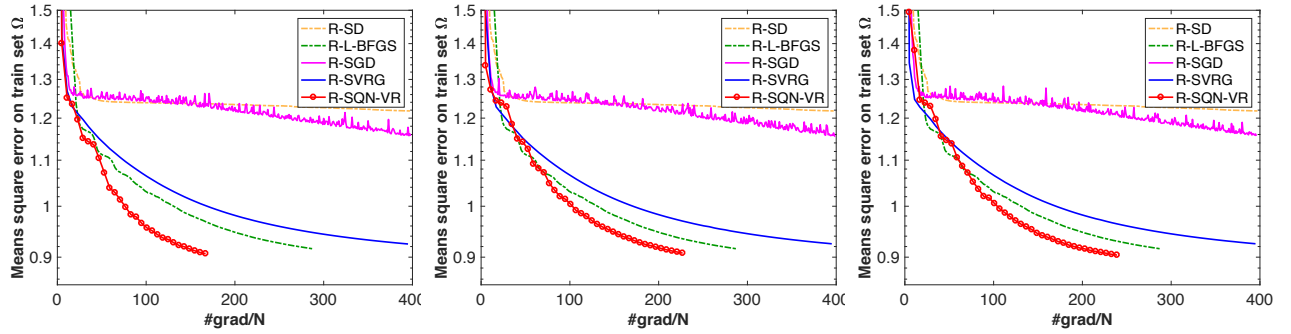

(a-1) run 1

(a-2) run 2

(a-3) run 3

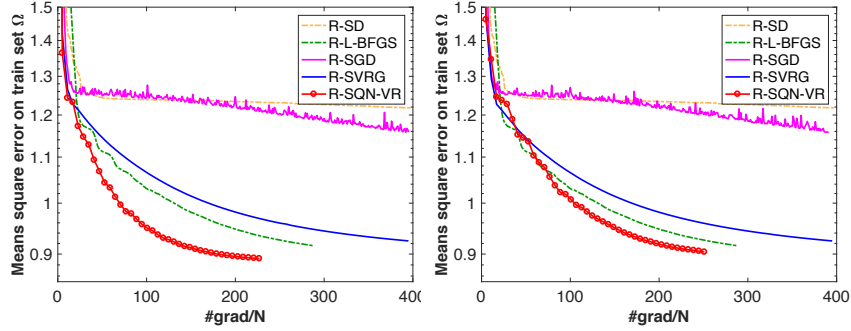

(a-4) run 4

(a-5) run 5

(a) MSE on train set  $\Omega$

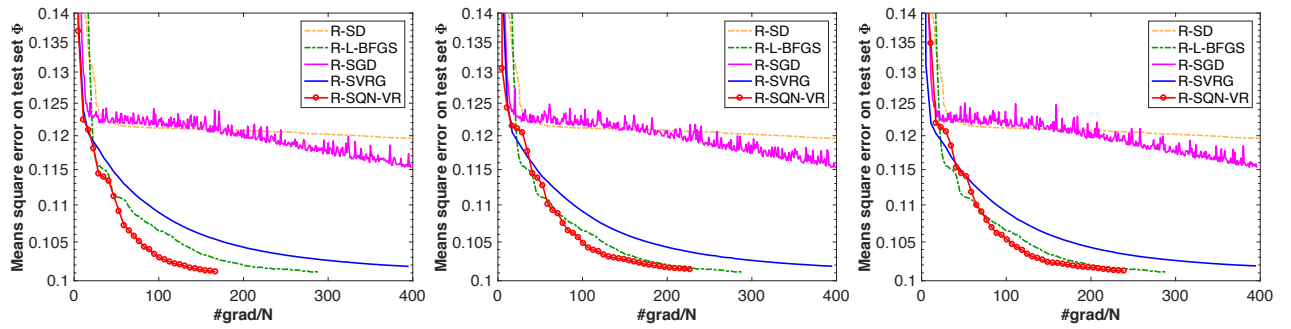

(b-1) run 1

(b-2) run 2

(b-3) run 3

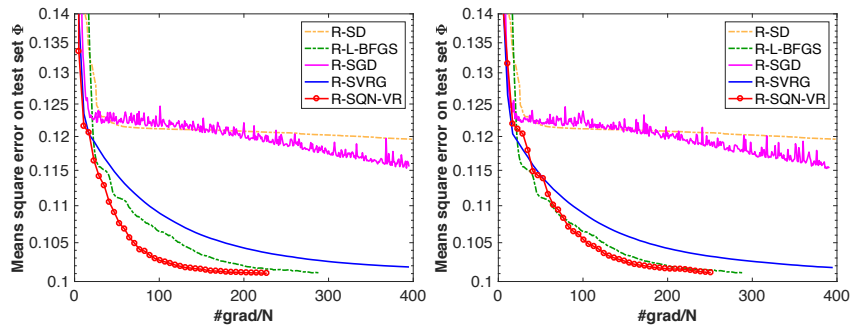

(b-4) run 4

(b-5) run 5

(b) MSE on test set  $\Phi$

Figure A.8: Performance evaluations on low-rank MC problem (MC-R1: lower rank).

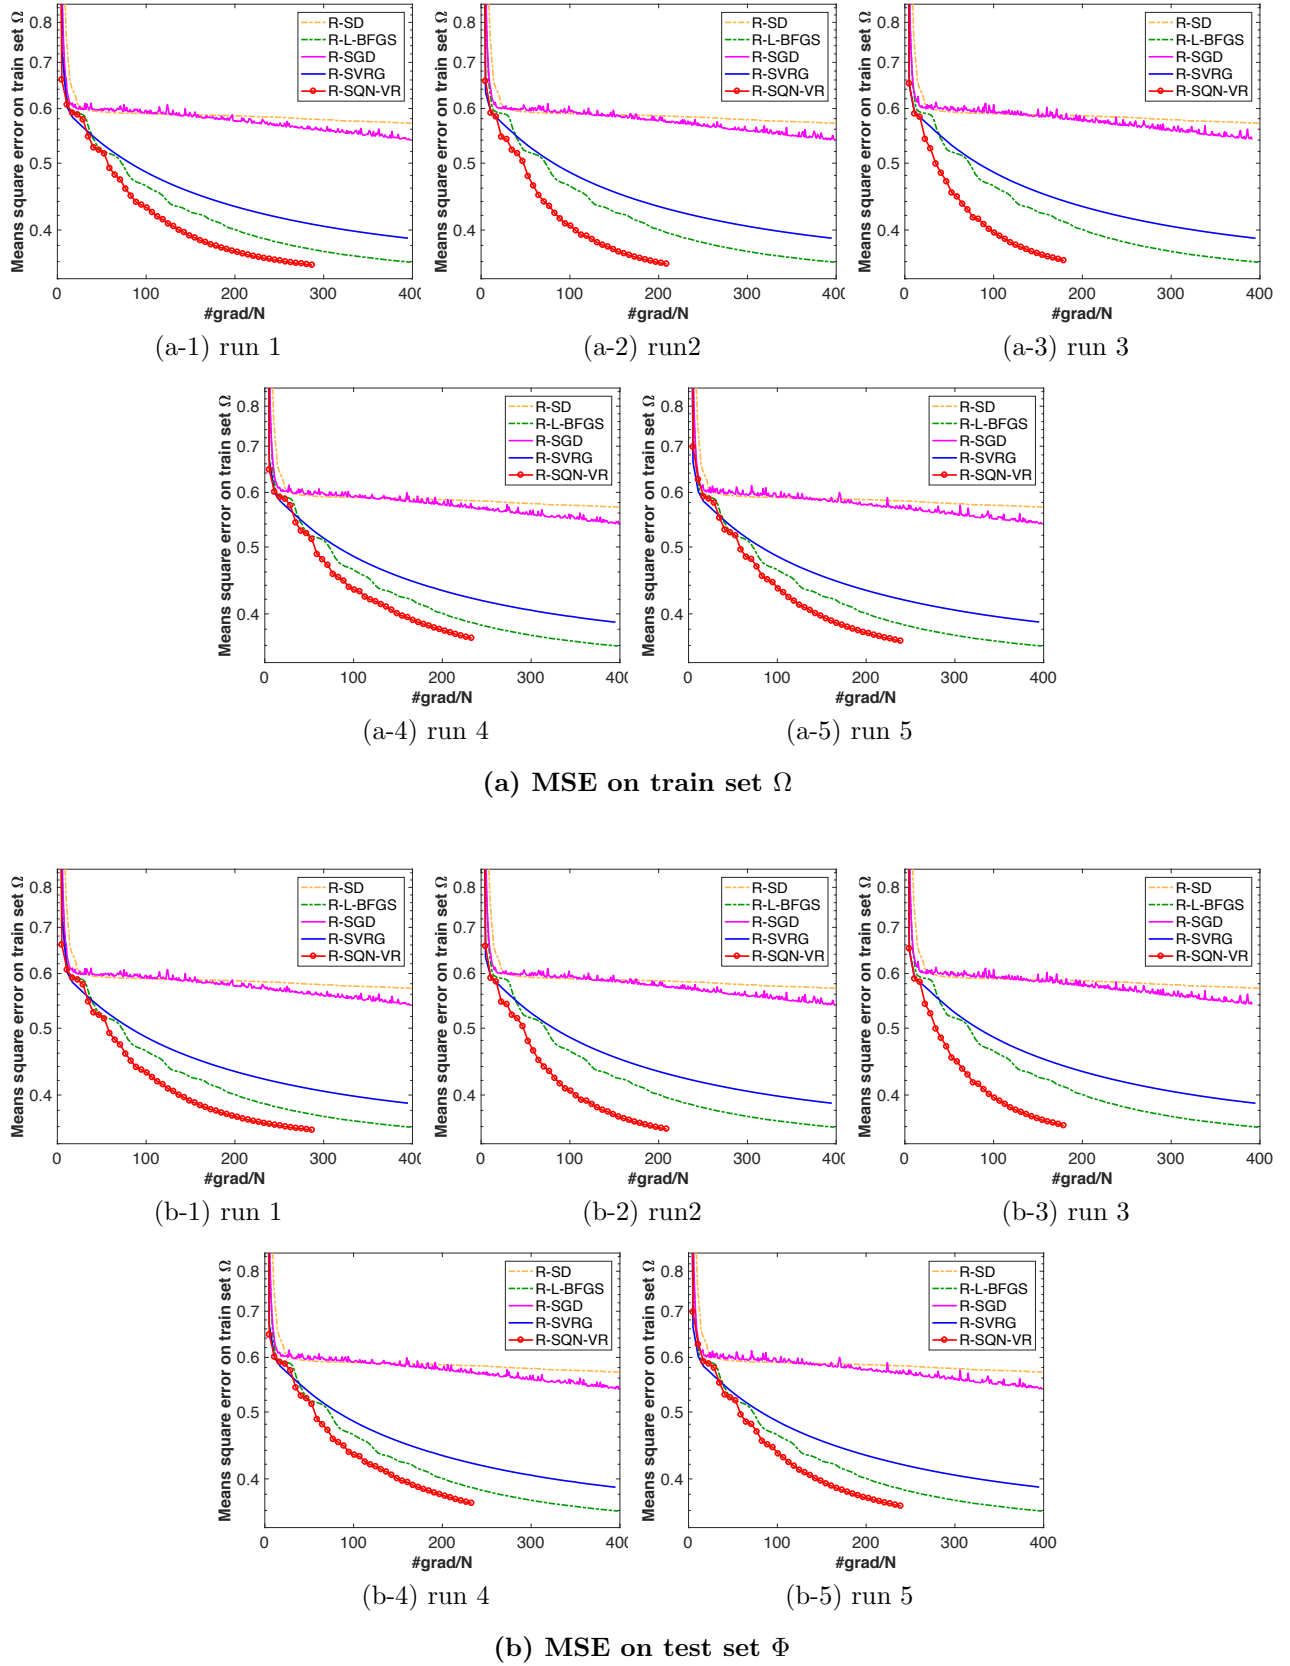

Figure A.9: Performance evaluations on low-rank MC problem (MC-R2: higher rank).
